# Supplementary material for: Prevalence of elevated liver transaminases and their relationship with alcohol use in people living with HIV on anti-retroviral therapy in Uganda
Source: PubMed Central journal article supplement (PMC8168875; doi:10.1371/journal.pone.0250368), 2021-06-01
Supplement: pone.0250368.s001.pdf [file pone.0250368.s001.pdf]

**ADEPTT Study Screening Step 1**  
**Initial Eligibility Screening – self-report**

DATE: \_\_\_/\_\_\_/\_\_\_\_\_  
 (DAY/MONTH/YEAR)

ADEPTT SCREENING ID: SCT \_\_\_\_\_

|                                                                                               |                                |                                    |
|-----------------------------------------------------------------------------------------------|--------------------------------|------------------------------------|
| Completed by phone or in-person?                                                              | <input type="checkbox"/> Phone | <input type="checkbox"/> In-person |
| Is this a Uganda ARCH prior participant?                                                      | <input type="checkbox"/> Yes   | <input type="checkbox"/> No        |
| If prior participant, enter study ID:<br>ADEPT Study ID: MBD _____ BREATH Study ID: MBB _____ |                                |                                    |
| What is the patient's sex?                                                                    | <input type="checkbox"/> Male  | <input type="checkbox"/> Female    |

**Initial eligibility assessment.**

|                                                                                                               |                              |                                        |
|---------------------------------------------------------------------------------------------------------------|------------------------------|----------------------------------------|
| 1. How old are you? ___ years → is patient 18 years or older?                                                 | <input type="checkbox"/> Yes | <input type="checkbox"/> No            |
| 2. Are you fluent in either Runyakole or English?                                                             | <input type="checkbox"/> Yes | <input type="checkbox"/> No            |
| 3. Have you been on ART for 6 or more months?                                                                 | <input type="checkbox"/> Yes | <input type="checkbox"/> No/Don't know |
| 3a. If yes: Are you currently on or prescribed Nevirapine (NVP)?                                              | <input type="checkbox"/> Yes | <input type="checkbox"/> No            |
| 3b. If not currently on NVP: Have you taken NVP in the past 2 weeks?                                          | <input type="checkbox"/> Yes | <input type="checkbox"/> No            |
| 4. Do you live within 2 hours travel time of the ISS Clinic?                                                  | <input type="checkbox"/> Yes | <input type="checkbox"/> No            |
| 5. Do you have plans to move more than 2 hours from the ISS Clinic, within the next 6 months?                 | <input type="checkbox"/> Yes | <input type="checkbox"/> No            |
| 6. Have you ever had active TB before?                                                                        | <input type="checkbox"/> Yes | <input type="checkbox"/> No/Don't know |
| 7. Have you ever taken TB medications before, to treat or prevent TB?                                         | <input type="checkbox"/> Yes | <input type="checkbox"/> No/Don't know |
| 8. Are you currently taking anti-convulsion medications, or do you have any plans to take them in the future? | <input type="checkbox"/> Yes | <input type="checkbox"/> No            |
| 9. Have you had any alcohol to drink in the past year?                                                        | <input type="checkbox"/> Yes | <input type="checkbox"/> No            |
| 9a. If yes: Have you had any alcohol to drink in the past 3 months?                                           | <input type="checkbox"/> Yes | <input type="checkbox"/> No            |

**Eligible:** YES to questions 1, 2, 3 & 4; **NO/DON'T KNOW** to questions 5, 6, 7 & 8. (ticks in the unshaded boxes)

**Ineligible:** Currently on NVP (YES to 3a) or taken NVP in the past 2 weeks (YES to question 3b), or Prior year drinker who is not a prior 3 month drinker, but who drank 4-12 months ago (ie. YES to question 9 *plus* NO to question 9a) (ticks in a shaded box)

**If eligible:** ask participant if they are interested in continuing with further screening.

**Reason for declining further screening:**

**Eligibility status:**

- Ineligible.
- Eligible, declines further screening.  
**(specify reason to the right)**
- Eligible.  
**(Refer to RA for consent for further screening)**

- 1 = Time barred
- 2 = Stigma/disclosure issues
- 3 = Needs additional approval from family member
- 4 = Too weak
- 5 = Not interested
- 6 = Declines blood draw
- 7 = Declines to answer
- 8 = Other (specify) \_\_\_\_\_

**Notes:**

**Screener initials:** \_\_\_\_\_

|          | Initials | Date |
|----------|----------|------|
| QC check |          |      |
| Entry 1  |          |      |
| Entry 2  |          |      |
